# Supplementary material
Source: PubMed Central journal article supplement (PMC7910662)
Supplement: mmc1.pdf [file mmc1.pdf]

## POINT: Tracheostomy in Patients With COVID-19

Should We Do It Before 14 Days? Yes

*Michael J. Brenner, MD; David Feller-Kopman, MD; and Jose De Cardenas, MD*

CHEST 2021; 159(5):1723-1727

*Online supplements are not copyedited prior to posting and the author(s) take full responsibility for the accuracy of all data.*

© 2021 AMERICAN COLLEGE OF CHEST PHYSICIANS. Reproduction of this article is prohibited without written permission from the American College of Chest Physicians. See online for more details. DOI: 10.1016/j.chest.2021.01.074

**e-Appendix 1.****REFERENCES for Figure 2**

Sabouri M, Esmaeili T, Hosseini B. sabouri. *Jounral Isfahan Med Sch.* 2009;27(95):211-216.

Bylappa K, Mohiyudin A, Delphine W, Silvia CR, Krishnamurthy D, Pyarajan MS. A comparative study of early and late tracheostomy in patients requiring prolonged tracheal intubation. *World Articles Ear Nose Throat.* 2011;4(2). <http://www.waent.org/archives/2011/Vol4-2/20111215-Tracheostomy-Intubation/late-tracheotomy.htm>

Rodriguez J, Steinberg SM, Luchetti F, Gibbons K, Taheri P, Flint LM. Early tracheostomy for primary airway management in the surgical critical care. *Surgery.* 1990;108(4):655-659.

Rumbak MJ, Newton M, Truncale T, Schwartz SW, Adams JW, Hazard PB. A prospective, randomized, study comparing early percutaneous dilational tracheotomy to prolonged translaryngeal intubation (delayed tracheotomy) in critically ill medical patients\*. 2004;32(8). doi:10.1097/01.CCM.0000134835.05161.B6

Koch T, Hecker B, Hecker A, Brenck F, Preuß M. Early tracheostomy decreases ventilation time but has no impact on mortality of intensive care patients: a randomized study. Published online 2012:1001-1008. doi:10.1007/s00423-011-0873-9

Filaire M, Tardy MM, Richard R, et al. Prophylactic tracheotomy and lung cancer resection in patient with low predictive pulmonary function: a randomized clinical trials. 2011;4(4):1-13. doi:10.3978/j.issn.2304-3865.2015.11.05

Mohamed A, Yehia A, Samir A. Early versus late percutaneous tracheostomy in critically ill adult mechanically ventilated patients Kamel Abd Elaziz Mohamed. *Egypt J Chest Dis Tuberc.* 2014;63(2):443-448. doi:10.1016/j.ejcdt.2014.01.008

Zheng Y, Chen X, Zhang G, et al. Early versus late percutaneous dilational tracheostomy in critically ill patients anticipated 418 requiring prolonged mechanical ventilation. *Chin Med J (Engl).* 2012;125(2007):1925-1930. doi:10.3760/cma.j.issn.0366-6999.2012.11.016

Karlovic Z, Vladic D, Peric M, Mihalj M, Zadro ŽE, Majeric-Kogler V. Th e impact of early percutaneous tracheotomy on reduction of the incidence of ventilator associated pneumonia and the course and outcome of ICU patients. 2018;14:75-80.

Terragni P, Faggiano C, Martin EL, Ranieri VM. Tracheostomy in mechanical ventilation. *Semin Respir Crit Care Med.* 2014;35(4):482-491. doi:10.1055/s-0034-1383862

Sugerman H, Wolfe L, Pasquale M, et al. Sugerman. *J Trauma Inj Infect Crit Care.* 1997;43(5):741-747.

Bouderka MA, Fakhir B, Bouaggad A, Hmamouchi B. Early Tracheostomy versus Prolonged Endotracheal Intubation in Severe Head Injury. 2004;57(2):251-254. doi:10.1097/01.TA.0000087646.68382.9A

Trouillet J, Luyt C, Guiguet M, Ouattara A, Vaissier E. Early Percutaneous Tracheotomy Versus Prolonged Intubation of Mechanically Ventilated Patients After Cardiac Surgery. *Ann Intern Med.* 2011;154:373-383.

Diaz-Prieto A, Mateu A, Gorriz M, et al. A randomized clinical trial for the timing of tracheotomy in critically ill patients: factors precluding inclusion in a single center study. Published online 2014:1-11. doi:10.1186/s13054-014-0585-y

Dunham CM, LaMonica C. Prolonged Tracheal Intubation in the Trauma Patient. Published online 1984:120-124.

Blot F, Similowski T, Chardon P, Costa M, Thie G, Durand-zaleski I. Early tracheotomy versus prolonged endotracheal intubation in unselected severely ill ICU patients. Published online 2008:1779-1787. doi:10.1007/s00134-008-1195-4

Dunham CM, Cutrona AF, Gruber BS, Calderon JE, Ransom KJ, Flowers LL. Early tracheostomy in severe traumatic brain injury: evidence for decreased mechanical ventilation and increased hospital mortality. *Int J Burns Trauma.* 2014 Feb 22;4(1):14-24.

Saffle JR, Morris FSE, Edelman FL. Early Tracheostomy Does Not Improve Outcome in Burn Patients. Published online 2002:431-438. doi:10.1097/01.BCR.0000036586.83628.F9

Barquist E, Amortegui J, Hallal A, et al. Tracheostomy in Ventilator Dependent Trauma Patients: A Prospective, 376 Randomized Intention-to-Treat Study. 2006;60(1):91-91. doi:10.1097/01.ta.0000196743.37261.3f

Bösel J, Schiller P, Hook Y, et al. Stroke-related early tracheostomy versus prolonged orotracheal intubation in neurocritical care trial (SETPOINT): A randomized pilot trial. *Stroke.* 2012;44(1):21-28. doi:10.1161/STROKEAHA.112.669895
